# Supplementary material for: Gene target specificity of the Super Elongation Complex (SEC) family: how HIV-1 Tat employs selected SEC members to activate viral transcription
Source: PubMed Central journal article supplement (PMC4499153; doi:10.1093/nar/gkv541), 2015-05-24

## Inventory of Supplemental Information

This document contains Supplemental Figure S1 and legend that pertain to main Figure 3.

### Title: Gene target specificity of the Super Elongation Complex (SEC) family: How HIV-1 Tat employs selected SEC members to activate viral transcription

By Huasong Lu, Zichong Li, Wei Zhang, Ursula Schulze-Gahmen, Yuhua Xue, and Qiang Zhou

### Supplemental Figure and Legend

**Figure S1 (related to main Figure 3). Point mutations in the CBS regions of AFF1 and AFF4 affect the interactions of Tat with not only P-TEFb but also AFF1/4 themselves.** A & B. HeLa cells were co-transfected with the indicated expression constructs. Nuclear extracts (NE) from the transfected cells as well as anti-Flag immunoprecipitates (IP) derived from the NE were examined by Western blotting (WB) for the presence of the labeled proteins.

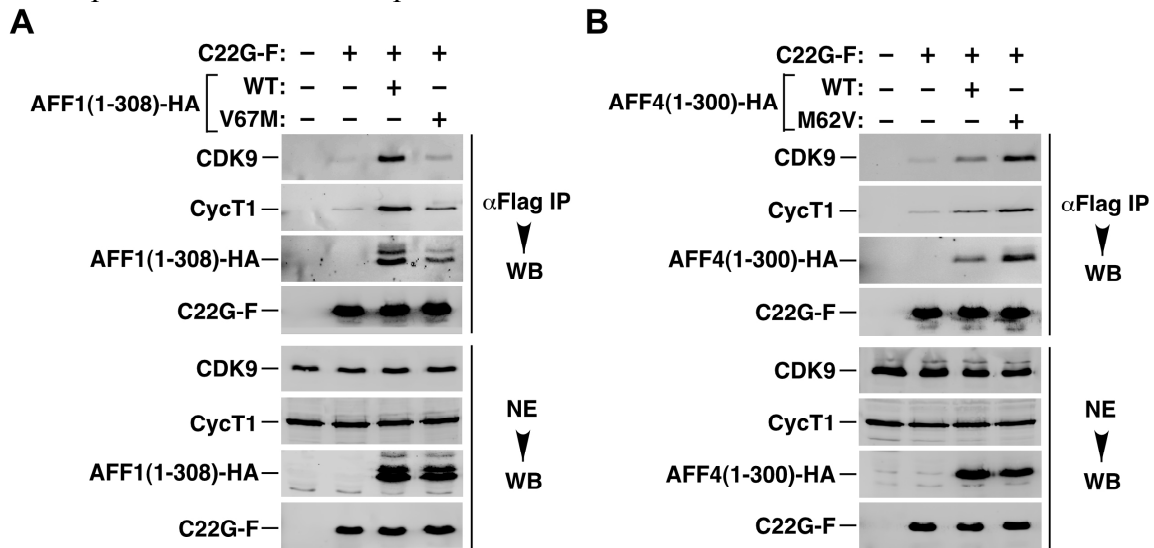

Supplement: supp_gkv541_nar-01001-a-2015-File008.pdf [file supp_gkv541_nar-01001-a-2015-File008.pdf]
